# Supplementary material
Source: HighWire-hosted journal article supplement (https://bmjopen.bmj.com/content/9/7/e025916)
Supplement: inline-supplementary-material-1 [file inline-supplementary-material-1.pdf]

**Supplementary table: Read medical codes used for definition of Lyme disease events**

| <b>Read medical code</b> | <b>Code description</b>                     |
|--------------------------|---------------------------------------------|
| <b>Diagnoses</b>         |                                             |
| A871000                  | Lyme disease                                |
| N010A00                  | Arthritis in Lyme disease                   |
| AA41.00                  | Erythema chronicum migrans                  |
| <b>Laboratory tests</b>  |                                             |
| 43T0100                  | Lyme ELISA positive                         |
| 43T0300                  | Lyme ELISA reactive                         |
| 43T1100                  | Lyme immunoblot positive                    |
| 43T0200                  | Lyme ELISA equivocal                        |
| 43T1200                  | Lyme immunoblot equivocal                   |
| 43e0.00                  | Borrelia burgdorferi IgG level              |
| 43e1.00                  | Borrelia burgdorferi antibody level         |
| 43e3.00                  | Borrelia burgdorferi blot test              |
| 43ek.00                  | Borrelia burgdorferi IgM level              |
| 43j2.00                  | Borrelia burgdorferi nucleic acid detection |
| 43T..00                  | Lyme disease test                           |
| 43T0.00                  | Lyme ELISA test                             |
| 43T1.00                  | Lyme immunoblot test                        |
| 4JDf.00                  | Borrelia serology                           |
